# Supplementary material for: Impact of psychologically tailored hand hygiene interventions on nosocomial infections with multidrug-resistant organisms: results of the cluster-randomized controlled trial PSYGIENE
Source: PubMed Central journal article supplement (PMC6434638; doi:10.1186/s13756-019-0507-5), 2019-03-25
Supplement: 13756_2019_507_MOESM2_ESM.pdf [file 13756_2019_507_MOESM2_ESM.pdf]

**Table S2: Behavior change techniques used in the PSYGIENE-trial\***

| <b>Behaviour change techniques used in both study arms</b>                                                                              | <b>Behaviour change techniques used in the “Tailoring”-arm only</b>                                                                   |
|-----------------------------------------------------------------------------------------------------------------------------------------|---------------------------------------------------------------------------------------------------------------------------------------|
| 1.1 Goal setting (behaviour), e.g. visualization of the WHO-“Five moments for hand hygiene”                                             | 1.2 Problem solving, e.g. feedback discussions on optimizing sequences of workflow as assessed in problem- centred interviews         |
| 2.2 Feedback on behaviour, e.g. reflection of wards’ compliance rates and respective rankings                                           | 1.4 Action planning, e.g. reflect and discuss implementation intentions as assessed in survey                                         |
| 2.4 Self-monitoring of outcome(s) of behaviour, e.g. presentation of compliance rates and discussion of options for monitoring on wards | 3.2 Social support (practical), e.g. feedback discussions on optimizing dispenser provisions                                          |
| 2.7 Feedback on outcome(s) of behaviour, e.g. feedback on hospital-wide NI rates                                                        | 3.3 Social support (emotional), e.g. active listening in feedback discussions to evoke reflection on balancing benefits and costs     |
| 3.1 Social support (unspecified), e.g. identification and forwarding of employees’ ideas for improvement                                | 4.4 Behavioural experiments, e.g. Fluorescence behaviour training by fluorescence methods using ultraviolet light boxes               |
| 4.1 Instruction on how to perform the behaviour, e.g. visualizations using task-related images                                          | 6.3 Information about others’ approval, e.g. reflection of perceived recognition by superiors for compliance as assessed in survey    |
| 5.1 Information about health consequences, e.g. knowledge transfer on consequences of non-compliance and NIs                            | 7.1 Prompts/cues, e.g. laminated information sheets distributed in wards’ common rooms                                                |
| 5.3 Information about social and environmental consequences, e.g. knowledge transfer on economic consequences of NIs                    | 8.1 Behavioural practice/rehearsal, e.g. exercises on hand hygiene in line with guidelines regarding glove use                        |
| 5.6 Information about emotional consequences, e.g. knowledge transfer on psychological consequences of NIs                              | 8.7 Graded tasks, e.g. focusing on individual indications such as before aseptic procedures                                           |
| 6.1 Demonstration of the behaviour, e.g. presentation of behaviour with fluorescence methods using ultraviolet light boxes              | 10.4 Social reward, e.g. awarding incentives to wards with highest compliance at university celebrations                              |
| 6.2 Social comparison, e.g. comparison with compliance rates of other wards (blinded) in order to activate social behavioural norms     | 12.5 Adding objects to the environment, e.g. optimizing hygiene facilities to reduce self-regulatory effort                           |
| 8.6 Generalisation of target behaviour, e.g. transfer of problem-solving approaches across indications                                  | 13.1 Identification of self as role model, e.g. illustration and discussion of the function of role models in hand hygiene compliance |
| 9.2 Pros and cons, e.g. discussing effects of compliance and noncompliance                                                              | 13.2 Framing/Reframing, e.g. raising the issue of compliance as a team task (team cooperation)                                        |
| 15.1 Verbal persuasion about capability, e.g. discussion of positive compliance development                                             | 14.6 Situation-specific reward, e.g. certification of ward with highest compliance with the trial                                     |
| 15.3 Focus on past success, e.g. discussion of best year                                                                                |                                                                                                                                       |

\* Labels for behaviour change techniques come from the taxonomy developed by Michie and colleagues<sup>33</sup>.
