# Supplementary material for: Impact of psychologically tailored hand hygiene interventions on nosocomial infections with multidrug-resistant organisms: results of the cluster-randomized controlled trial PSYGIENE
Source: PubMed Central journal article supplement (PMC6434638; doi:10.1186/s13756-019-0507-5), 2019-03-25
Supplement: 13756_2019_507_MOESM3_ESM.pdf [file 13756_2019_507_MOESM3_ESM.pdf]

**Table S3: Distribution of the 92 nosocomial MDRO-infections in 86 patients by pathogen\***

|                              |                            | 2013      | 2014      | 2015      | TOTAL     |
|------------------------------|----------------------------|-----------|-----------|-----------|-----------|
| <b>„Tailoring“-study arm</b> | MRSA                       | 4         | 4         | 1         | 9         |
|                              | VRE <i>E. faecium</i>      | 14        | 11        | 8         | 33        |
|                              | MRGN                       | 12        | 6         | 4         | 22        |
|                              | <b>TOTAL</b>               | <b>30</b> | <b>21</b> | <b>13</b> | <b>64</b> |
|                              | 3MRGN <i>E. coli</i>       | 5         | 3         | 1         | 9         |
|                              | 3MRGN <i>P. aeruginosa</i> | 1         | 1         | 1         | 3         |
|                              | 3MRGN <i>E. cloacae</i>    | 1         | 0         | 0         | 1         |
|                              | 3MRGN <i>K. pneumoniae</i> | 1         | 2         | 0         | 3         |
|                              | 3MRGN <i>Acinetobacter</i> | 1         | 0         | 0         | 1         |
|                              | 3MRGN other                | 0         | 0         | 0         | 0         |
|                              | 4MRGN <i>P. aeruginosa</i> | 2         | 0         | 1         | 3         |
|                              | 4MRGN <i>K. pneumoniae</i> | 0         | 0         | 0         | 0         |
|                              | 4MRGN <i>Acinetobacter</i> | 1         | 0         | 0         | 1         |
|                              | 4MRGN <i>Citrobacter</i>   | 0         | 0         | 1         | 1         |
| <b>„ASH“-study arm</b>       | MRSA                       | 0         | 3         | 1         | 4         |
|                              | VRE <i>E. faecium</i>      | 0         | 2         | 4         | 6         |
|                              | MRGN                       | 9         | 5         | 4         | 18        |
|                              | <b>TOTAL</b>               | <b>9</b>  | <b>10</b> | <b>9</b>  | <b>28</b> |
|                              | 3MRGN <i>E. coli</i>       | 3         | 2         | 0         | 5         |
|                              | 3MRGN <i>P. aeruginosa</i> | 2         | 1         | 3         | 6         |
|                              | 3MRGN <i>E. cloacae</i>    | 1         | 0         | 1         | 2         |
|                              | 3MRGN <i>K. pneumoniae</i> | 0         | 0         | 0         | 0         |
|                              | 3MRGN <i>Acinetobacter</i> | 1         | 0         | 0         | 1         |
|                              | 3MRGN other                | 0         | 1         | 0         | 1         |
|                              | 4MRGN <i>P. aeruginosa</i> | 2         | 0         | 0         | 2         |
|                              | 4MRGN <i>K. pneumoniae</i> | 0         | 1         | 0         | 1         |
|                              | 4MRGN <i>Acinetobacter</i> | 0         | 0         | 0         | 0         |
|                              | 4MRGN <i>Citrobacter</i>   | 0         | 0         | 0         | 0         |
| <b>Total</b>                 | MRSA                       | 4         | 7         | 2         | 13        |
|                              | VRE <i>E. faecium</i>      | 14        | 13        | 12        | 39        |
|                              | MRGN                       | 21        | 11        | 8         | 40        |
|                              | <b>TOTAL</b>               | <b>39</b> | <b>31</b> | <b>22</b> | <b>92</b> |
|                              | 3MRGN <i>E. coli</i>       | 8         | 5         | 1         | 14        |
|                              | 3MRGN <i>P. aeruginosa</i> | 3         | 2         | 4         | 9         |
|                              | 3MRGN <i>E. cloacae</i>    | 2         | 0         | 1         | 3         |
|                              | 3MRGN <i>K. pneumoniae</i> | 1         | 2         | 0         | 3         |
|                              | 3MRGN <i>Acinetobacter</i> | 2         | 0         | 0         | 2         |
|                              | 3MRGN other                | 0         | 1         | 0         | 1         |
|                              | 4MRGN <i>P. aeruginosa</i> | 4         | 0         | 1         | 5         |
|                              | 4MRGN <i>K. pneumoniae</i> | 0         | 1         | 0         | 1         |
|                              | 4MRGN <i>Acinetobacter</i> | 1         | 0         | 0         | 1         |
|                              | 4MRGN <i>Citrobacter</i>   | 0         | 0         | 1         | 1         |

\*The terms 3MRGN vs. 4MRGN refer to a classification of Gram-negative MDROs in terms of their susceptibility against four classes of antimicrobials (acylureidopenicillins, third- and fourth-generation cephalosporins, quinolones, and carbapenems): a multi-resistant strain is classified as 3MRGN if resistant to three out of four classes, or as 4MRGN if resistant to all four classes.<sup>48</sup>
